# Supplementary material for: Dynamic spreading of chromatin-mediated gene silencing and reactivation between neighboring genes in single cells
Source: eLife journal article supplement (doi:10.7554/elife.75115), 2022-04-22

**Figure 1 – figure supplement 2.** Original gel images from RT-PCR.

**B. K562 HDAC4 NS**

Column 1 – Generuler 1kb + Ladder  
Column 2 – run-on transcript 5 days -dox  
Column 3 – run-on transcript 5 days +dox mCherry spike  
Column 4 – run-on transcript 20 days -dox  
Column 5 – run-on transcript 20 days +dox  
Column 6 – run-on transcript no reverse transcriptase control  
Column 7 – beta-actin control 5 days -dox  
Column 8 – beta-actin control 5 days +dox mCherry spike  
Column 9 – beta-actin control 20 days -dox  
Column 10 – beta-actin control 20 days +dox  
Column 11 – beta-actin no reverse transcriptase control  
Column 12 – Generuler 1kb + Ladder

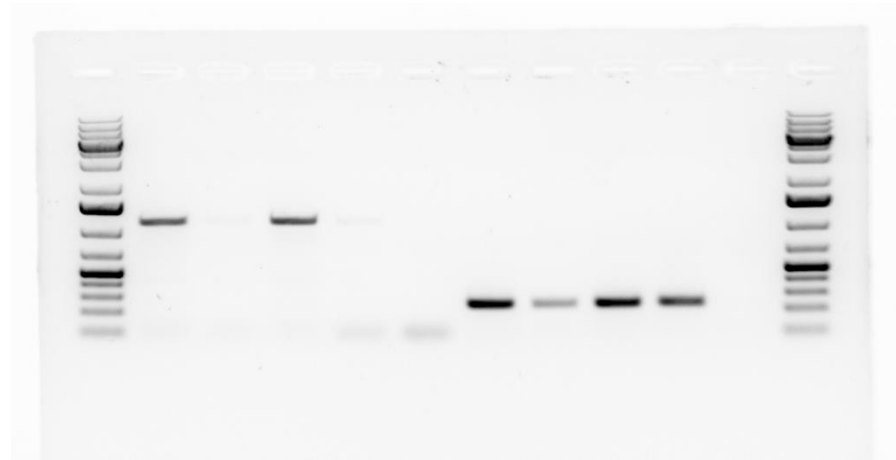

## F. CHO HDAC4 SH

Run-on transcript (left gel in panel F)

- Column 1 – Generuler 1kb + Ladder
- Column 2 – clone 21 cDNA day 0
- Column 3 – clone 21 cDNA day 1
- Column 4 – clone 21 cDNA day 5
- Column 5 – clone 21 no reverse transcriptase control
- Column 6 – clone 21 gDNA
- Column 7 – clone 26 cDNA day 0
- Column 8 – clone 26 cDNA day 1
- Column 9 – clone 26 cDNA day 5
- Column 10 – clone 26 no reverse transcriptase control
- Column 11 – clone 26 gDNA
- Column 12 – Generuler 1kb + Ladder

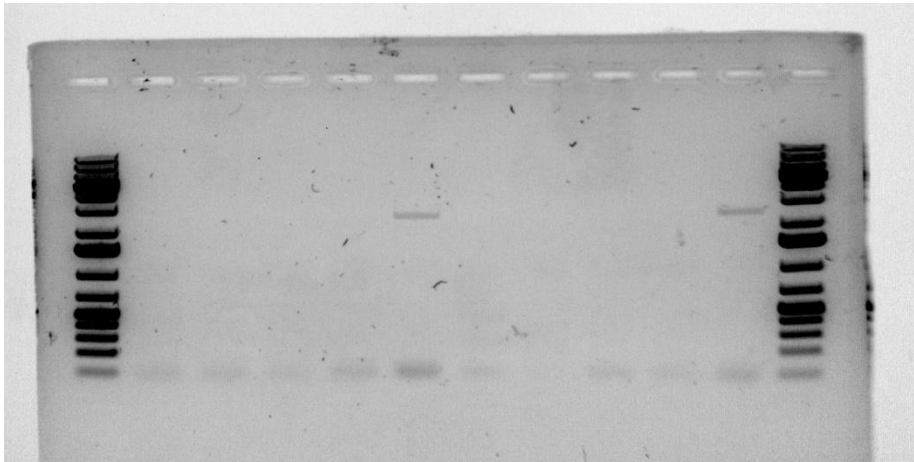

Beta-actin control (right gel in panel F)

- Column 1 – Generuler 1kb + Ladder
- Column 2 – clone 21 cDNA day 0
- Column 3 – clone 21 cDNA day 1
- Column 4 – clone 21 cDNA day 5
- Column 5 – clone 21 no reverse transcriptase control
- Column 6 – no sample
- Column 7 – clone 26 cDNA day 0
- Column 8 – clone 26 cDNA day 1
- Column 9 – clone 26 cDNA day 5
- Column 10 – clone 26 no reverse transcriptase control
- Column 11 – no sample
- Column 12 – Generuler 1kb + Ladder

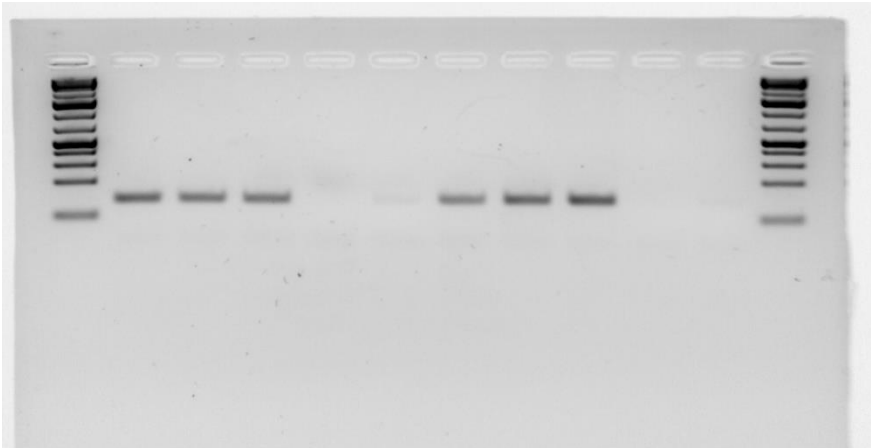

Supplement: fig1-figsupp4-data1 [file elife-75115-fig1-figsupp4-data1-v1.zip]
